# Supplementary material
Source: bioRxiv or medRxiv preprint supplement (https://medrxiv.org/content/medrxiv/early/2021/03/17/2021.03.16.21253686/DC1/embed/media-1.pdf)
Supplement: Supplementary file [file media-1.pdf]

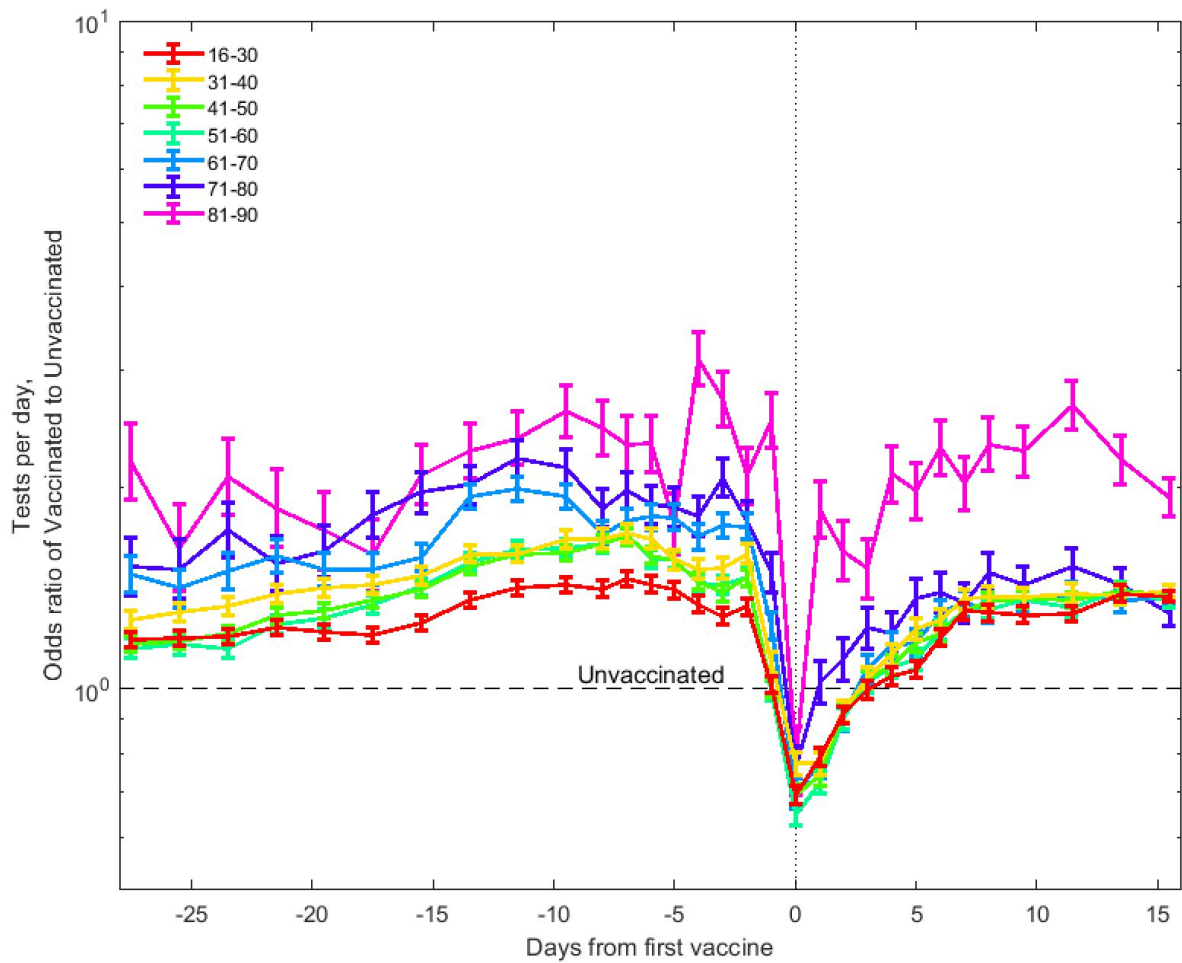

**Supplementary Figure 1: Odds ratio for testing as a function of time from vaccination relative to unvaccinated reference.** Results of logistic regression models for tests per day for each of the 7 age groups (colors, legend). Odds ratio of tests, relative to unvaccinated, are plotted for times pre- (negative) and post- (positive) vaccination.
